# Supplementary material for: Epstein-Barr Virus- (EBV-) Immortalized Lymphoblastoid Cell Lines (LCLs) Express High Level of CD23 but Low CD27 to Support Their Growth
Source: Adv Virol. 2019 Mar 28;2019:6464521. doi: 10.1155/2019/6464521 (PMC6458955; doi:10.1155/2019/6464521)
Supplement: Supplementary Materials — The table shows the studied cases with date of diagnosis, blood sampling, PBMCs cryopreservation, EBV immortalization, and duration of cryopreserved PBMCs. [file 6464521.f1.docx]

**Supplemental data:**

**Supplemental Table 1:**

| **Sample** | **Date of diagnosis** | **Date of blood sampling and PBMC cryopreservation** | **Date of PBMC revival and EBV immortalization** | **Duration of PBMC cryopreservation (days)** |
| --- | --- | --- | --- | --- |
| 1B | 21st Aug 2017 | 24th Nov 2017 | 18th Jan 2019 | 421 |
| 2C | 14th Sept 2017 | 15th Mar 2018 | 18th Jan 2019 | 310 |
| 4E | 11th Oct 2017 | 13th Sept 2018 | 10th Jan 2019 | 120 |
| 5B | 16th Oct 2017 | 30th Apr 2018 | 18th Jan 2019 | 264 |
| 6A | 27th Oct 2017 | 27th Oct 2017 | 11th Aug 2018 | 289 |
| 7B | 10th Nov 2017 | 6th Feb 2018 | 18th Jan 2019 | 347 |
| 8A | 23rd Nov 2017 | 23rd Nov 2017 | 11th Aug 2018 | 262 |
| 9D | 6th Dec 2017 | 24th Sept 2018 | 10th Jan 2019 | 109 |
| 10E | 8th Dec 2017 | 21st Sept 2018 | 10th Jan 2019 | 112 |
| 11A | 13th Dec 2017 | 13th Dec 2017 | 18th Jan 2019 | 402 |
| 12A | 20th Dec 2017 | 20th Dec 2017 | 18th Jan 2019 | 395 |
| 13B | 28th Mar 2018 | 25th June 2018 | 10th Jan 2019 | 200 |
| 14A | 18th Apr 2018 | 18th Apr 2018 | 11th Aug 2018 | 116 |
| 15A | 20th Apr 2018 | 20th Apr 2018 | 10th Jan 2019 | 266 |
| 16A | 20th Apr 2018 | 20th Apr 2018 | 11th Aug 2018 | 114 |
| 17A | 23rd Apr 2018 | 23rd Apr 2018 | 10th Jan 2019 | 263 |
| C | - | 8th May 2018 | 11th Aug 2018 | 96 |
